# Supplementary material for: Fronto-striatal dopamine D2 receptor availability is associated with cognitive variability in older individuals with low dopamine integrity
Source: PubMed Central journal article supplement (PMC8548594; doi:10.1038/s41598-021-00106-y), 2021-10-26
Supplement: 41598_2021_106_MOESM1_ESM.pdf [file 41598_2021_106_MOESM1_ESM.pdf]

Supplementary information

**Fronto-striatal dopamine D2 receptor availability is associated with cognitive variability in older individuals with low dopamine integrity**

Saana M. Korkki<sup>1\*</sup>, Goran Papenberg<sup>1</sup>, Nina Karalija<sup>2,3</sup>, Douglas D. Garrett<sup>4,5</sup>, Katrine Riklund<sup>2,3</sup>, Martin Lövdén<sup>6</sup>, Ulman Lindenberger<sup>4,5</sup>, Lars Nyberg<sup>2,3,7</sup>, Lars Bäckman<sup>1</sup>

<sup>1</sup>Aging Research Center, Karolinska Institute and Stockholm University, Stockholm, Sweden

<sup>2</sup>Department of Radiation Sciences, Diagnostic Radiology, Umeå University, Umeå, Sweden

<sup>3</sup>Umeå Center for Functional Brain Imaging, Umeå University, Umeå, Sweden

<sup>4</sup>Center for Lifespan Psychology, Max Planck Institute for Human Development, Berlin, Germany

<sup>5</sup>Max Planck UCL Centre for Computational Psychiatry and Ageing Research, Berlin, Germany and London, UK

<sup>6</sup>Department of Psychology, University of Gothenburg, Gothenburg, Sweden

<sup>7</sup>Department of Integrative Medical Biology, Umeå University, Umeå, Sweden

\*Corresponding author

## Supplementary information

As illustrated in Figure S1, the response time limitations imposed in the n-back task (maximum response time of 1.5 s) resulted in a truncated distribution of participants' response times for the higher-load conditions. In contrast to load 1, estimates of ISD RT and mean RT did not significantly correlate across participants for load 2,  $r = .11$ ,  $p = .150$ , or load 3,  $r = .00$ ,  $p = .997$ . Indeed, when examining only the slowest quartile of participants in each condition, we observed a significant negative association between ISD RT and mean RT for load 2,  $r = -.31$ ,  $p = .047$ , and load 3,  $r = -.48$ ,  $p = .001$ . Given the typically positive correlations between mean RT and ISD RT<sup>1</sup>, this suggests that within-person variability in response time may not have been accurately captured at the higher load conditions, especially for individuals with slower response speed. Thus, our main analyses focused on the 1-back condition, but we note that no significant correlations between IIV and D2DR availability ( $p$ s > .297), or grey- and white-matter integrity ( $p$ s > .102) were detected for the 2-back or 3-back conditions across the whole sample.

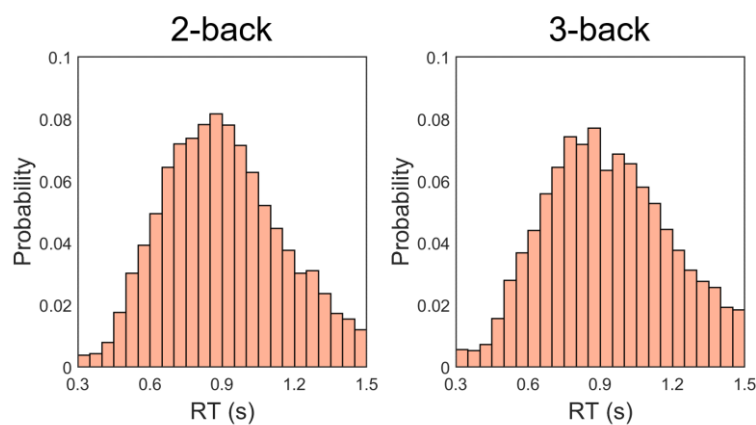

Figure S1. Distribution of participants' response times across correct trials in the 2-back and 3-back conditions of the in-scanner working memory task.

Table S1. Mean  $^{11}\text{C}$ -raclopride  $\text{BP}_{\text{ND}}$  (SD) across striatal and frontal subregions (n = 178).

| Region                 | Mean (SD)  |
|------------------------|------------|
| Caudate                | 2.18 (.31) |
| Putamen                | 3.35 (.27) |
| Superior frontal gyrus | .16 (.05)  |
| Middle frontal gyrus   | .20 (.05)  |
| Inferior frontal gyrus | .21 (.04)  |

Table S2. Partial correlations between ISD RT and D2DR availability (n = 176 for perceptual speed; n = 165 for 1-back), grey-matter volume (n = 178 for perceptual speed; n = 167 for 1-back), white matter hyperintensity burden (n = 168 for perceptual speed; n = 158 for 1-back), and white matter microstructure (n = 174 for perceptual speed; n = 165 for 1-back) across the whole sample, controlling for sex, education, and mean RT. Bootstrap 95% confidence intervals are displayed in brackets, p-values uncorrected.

|                      | Perceptual speed |             |      | 1-back |              |      |
|----------------------|------------------|-------------|------|--------|--------------|------|
|                      | r                | CI          | p    | r      | CI           | p    |
| D2DR availability    |                  |             |      |        |              |      |
| Striatum             | -.03             | [-.18, .12] | .670 | -.09   | [-.25, .07]  | .245 |
| Frontal cortex       | -.06             | [-.21, .11] | .462 | -.15   | [-.28, -.01] | .060 |
| Grey matter volume   |                  |             |      |        |              |      |
| Striatum             | .07              | [-.08, .20] | .395 | -.08   | [-.22, .06]  | .285 |
| Frontal cortex       | .10              | [-.07, .25] | .198 | -.10   | [-.24, .04]  | .187 |
| White matter lesions |                  |             |      |        |              |      |
| Lesion number        | -.02             | [-.17, .13] | .822 | -.01   | [-.15, .13]  | .915 |
| Lesion volume        | .03              | [-.10, .17] | .668 | .15    | [.00, .28]   | .073 |
| DTI                  |                  |             |      |        |              |      |
| FA SLF SFOF CC       | .10              | [-.07, .25] | .217 | .10    | [-.06, .26]  | .198 |
| MD SLF SFOF CC       | -.05             | [-.20, .11] | .533 | .02    | [-.13, .17]  | .813 |

Table S3. Partial correlations between mean RT and D2DR availability (n = 176 for perceptual speed; n = 165 for 1-back), grey matter volume (n = 178 for perceptual speed; n = 167 for 1-back), white matter hyperintensity burden (n = 168 for perceptual speed; n = 158 for 1-back), and white matter microstructure (n = 174 for perceptual speed; n = 165 for 1-back) across the whole sample, controlling for sex and education. Bootstrap 95% confidence intervals are displayed in brackets, p-values uncorrected.

|                      | Perceptual speed |             |      | 1-back |             |      |
|----------------------|------------------|-------------|------|--------|-------------|------|
|                      | r                | CI          | p    | r      | CI          | p    |
| D2DR availability    |                  |             |      |        |             |      |
| Striatum             | .06              | [-.10, .21] | .431 | .02    | [-.11, .15] | .770 |
| Frontal cortex       | .09              | [-.07, .24] | .244 | .04    | [-.12, .19] | .609 |
| Grey matter volume   |                  |             |      |        |             |      |
| Striatum             | -.03             | [-.19, .13] | .670 | .08    | [-.05, .22] | .317 |
| Frontal cortex       | -.03             | [-.19, .12] | .704 | .00    | [-.16, .16] | .977 |
| White matter lesions |                  |             |      |        |             |      |
| Lesion number        | .08              | [-.07, .23] | .285 | -.01   | [-.19, .16] | .879 |
| Lesion volume        | .00              | [-.16, .17] | .972 | -.05   | [-.21, .11] | .545 |
| DTI                  |                  |             |      |        |             |      |
| FA SLF SFOF CC       | .04              | [-.12, .20] | .589 | -.02   | [-.17, .13] | .789 |
| MD SLF SFOF CC       | .01              | [-.18, .19] | .938 | .00    | [-.17, .17] | .991 |

Table S4. Partial correlations between fronto-striatal D2DR BP<sub>ND</sub> and ISD RT in each subgroup after controlling for sex, education, and mean RT. Bootstrap 95% confidence intervals are displayed in brackets, and significant correlations (p < .05, two-tailed, uncorrected) are highlighted in bold.

|                  | Striatum                  |                     |             | Frontal cortex          |                     |             |
|------------------|---------------------------|---------------------|-------------|-------------------------|---------------------|-------------|
|                  | r                         | CI                  | p           | r                       | CI                  | p           |
| Perceptual speed |                           |                     |             |                         |                     |             |
| Class 1 (n = 97) | -.06                      | [-.26, .14]         | .567        | -.08                    | [-.28, .13]         | .463        |
| Class 2 (n = 39) | -.05                      | [-.40, .30]         | .765        | <b>-.39<sup>b</sup></b> | <b>[-.65, -.06]</b> | <b>.019</b> |
| Class 3 (n = 40) | -.02                      | [-.30, .28]         | .931        | .28                     | [-.01, .54]         | .089        |
| WM 1-back        |                           |                     |             |                         |                     |             |
| Class 1 (n = 93) | .04                       | [-.22, .27]         | .723        | .00                     | [-.19, .17]         | .978        |
| Class 2 (n = 39) | <b>-.36<sup>a,b</sup></b> | <b>[-.66, -.04]</b> | <b>.032</b> | <b>-.35</b>             | <b>[-.61, -.05]</b> | <b>.034</b> |
| Class 3 (n = 33) | .14                       | [-.23, .42]         | .462        | -.01                    | [-.34, .31]         | .974        |

Significant difference in correlation magnitudes between <sup>a</sup>Class 2 and Class 1, and <sup>b</sup>Class 2 and Class 3 (p < .050).

Table S5. Partial correlations between fronto-striatal D2DR BP<sub>ND</sub> and mean RT in each subgroup after controlling for sex and education. Bootstrap 95% confidence intervals are displayed in brackets, and significant correlations ( $p < .05$ , two-tailed, uncorrected) are highlighted in bold.

|                  | Striatum |             |      | Frontal cortex |                    |             |
|------------------|----------|-------------|------|----------------|--------------------|-------------|
|                  | r        | CI          | p    | r              | CI                 | p           |
| Perceptual speed |          |             |      |                |                    |             |
| Class 1 (n = 97) | .04      | [-.19, .26] | .717 | .01            | [-.20, .24]        | .893        |
| Class 2 (n = 39) | .08      | [-.27, .41] | .622 | .10            | [-.22, .41]        | .540        |
| Class 3 (n = 40) | .06      | [-.30, .44] | .726 | .20            | [-.13, .45]        | .238        |
| WM 1-back        |          |             |      |                |                    |             |
| Class 1 (n = 93) | -.10     | [-.31, .13] | .335 | -.10           | [-.26, .08]        | .345        |
| Class 2 (n = 39) | .12      | [-.18, .38] | .498 | .05            | [-.25, .40]        | .758        |
| Class 3 (n = 33) | .25      | [-.12, .51] | .179 | <b>.38</b>     | <b>[-.12, .68]</b> | <b>.037</b> |

## References

1. Jensen, A. R. The importance of intraindividual variation in reaction time. *Personality and Individual Differences* **13**, 869–881 (1992).
